# Supplementary material for: Desorption-induced evolution of cubic and hexagonal ices in an ultrahigh vacuum and cryogenic temperatures
Source: Royal Society of Chemistry journal article supplement (doi:10.1039/d1cp03872a), 2021-01-01
Supplement: d1cp03872a1.pdf [file d1cp03872a1.pdf]

## Supplementary information

### Desorption-induced Evolution of Cubic and Hexagonal Ices in Ultrahigh Vacuum and Cryogenic Temperatures

Gaurav Vishwakarma,<sup>†</sup> Jyotirmoy Ghosh,<sup>†</sup> and Thalappil Pradeep<sup>†\*</sup>

<sup>†</sup>DST Unit of Nanoscience (DST UNS) and Thematic Unit of Excellence (TUE), Department of Chemistry, Indian Institute of Technology Madras, Chennai 600036, India

#### AUTHOR INFORMATION

#### Corresponding author

\*Email: [pradeep@iitm.ac.in](mailto:pradeep@iitm.ac.in)

#### Table of Content

|                                                                                                                                                                                        |     |
|----------------------------------------------------------------------------------------------------------------------------------------------------------------------------------------|-----|
| <b>Fig. S1A.</b> RAIR spectra of 150 MLs of ACN, and 300 MLs of ACN:H <sub>2</sub> O.                                                                                                  | S3  |
| <b>Fig. S1B.</b> TPD spectra of ACN and ACN in 1:1, 1:5 and 5:1 mixtures.                                                                                                              | S4  |
| <b>Fig. S2.</b> Temperature-dependent RAIR spectra of 300 MLs of ACN:H <sub>2</sub> O (1:1).                                                                                           | S5  |
| <b>Fig. S3.</b> RAIR spectra of 150 MLs of pure ACN in the C≡N stretching region.                                                                                                      | S6  |
| <b>Fig. S4.</b> Comparison of O-H stretching bands of Ice I <sub>h</sub> and Ice I <sub>c</sub> obtained from 5:1 and 1:5 mixtures of ACN:H <sub>2</sub> O film with reference results | S7  |
| <b>Fig. S5.</b> Isothermal time-dependent RAIR spectra of 300 MLs of ACN:H <sub>2</sub> O (1:1) film at 125 K.                                                                         | S8  |
| <b>Fig. S6.</b> Isothermal time-dependent RAIR spectra of 300 MLs of ACN:H <sub>2</sub> O (1:1) film at 127 K.                                                                         | S9  |
| <b>Fig. S7.</b> Isothermal time-dependent RAIR spectra of 300 MLs of ACN:H <sub>2</sub> O (1:1) film at 135 K.                                                                         | S10 |
| <b>Fig. S8.</b> Isothermal time-dependent RAIR spectra of 300 MLs of ACN:H <sub>2</sub> O (1:1) film at 120 K.                                                                         | S11 |
| <b>Fig. S9.</b> Isothermal time-dependent RAIR spectra of 150 MLs of H <sub>2</sub> O film at 130 K.                                                                                   | S12 |
| <b>Fig. S10.</b> (a) Isothermal time-dependent RAIR spectra of 300 MLs of ACN:H <sub>2</sub> O in 1:5 and 5:1 ratio in the C≡N stretching region at 130 K.                             | S13 |
| <b>Fig. S11.</b> Isothermal time-dependent RAIR spectra of 300 MLs of ACN:H <sub>2</sub> O (1:5) film at 133 K.                                                                        | S14 |

**Fig. S12.** Isothermal time-dependent RAIR spectra of 300 MLs of ACN:H<sub>2</sub>O (1:5) film at 135 K. S15

**Fig. S13.** Isothermal time-dependent RAIR spectra of 300 MLs of ACN:H<sub>2</sub>O (5:1) film at 133 K. S16

**Fig. S14.** Isothermal time-dependent RAIR spectra of 300 MLs of ACN:H<sub>2</sub>O (5:1) film at 135 K. S17

**Table S1.** The parameters for crystallization of Ice I<sub>h</sub> during the desorption of ACN from ice films at different temperatures. S18

Supplementary Information 1A:

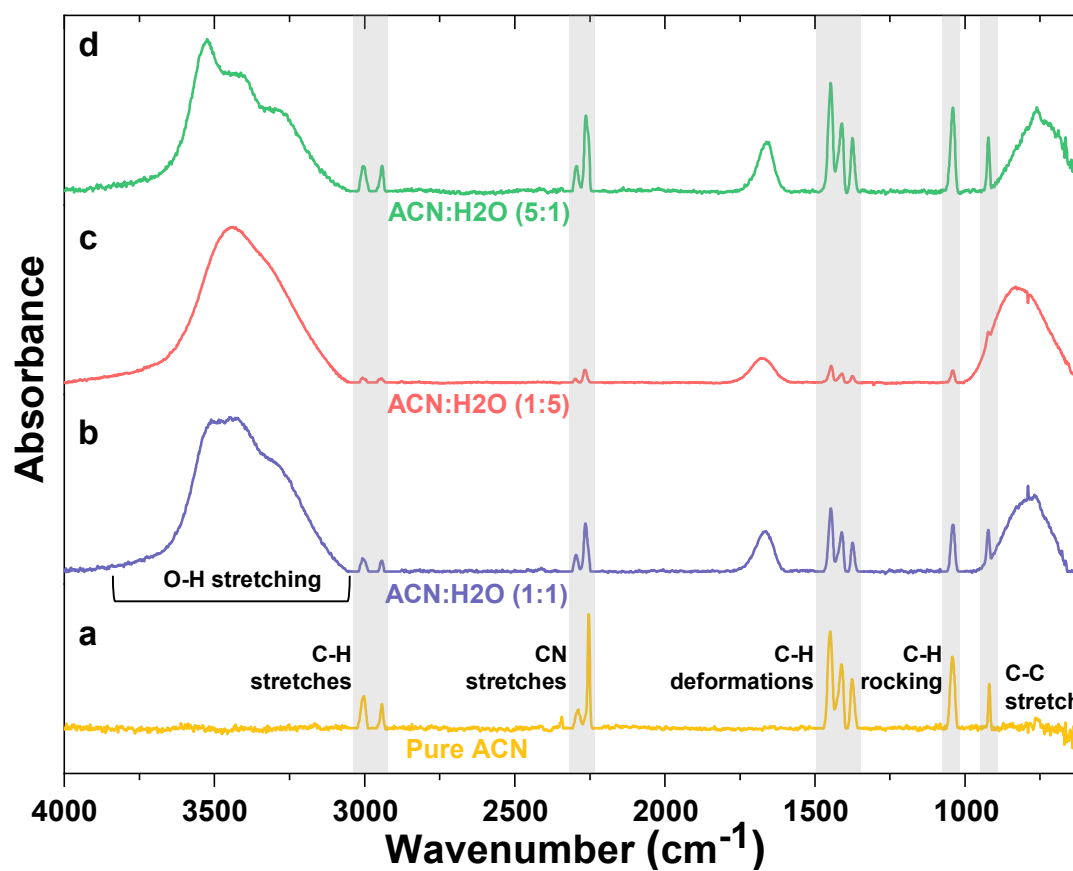

Fig. S1A RAIR spectra of (a) 150 MLs of ACN, (b) 300 MLs of 1:1 ACN:H<sub>2</sub>O, (c) 300 MLs of 1:5 ACN:H<sub>2</sub>O, (d) 300 MLs of 5:1 ACN:H<sub>2</sub>O at 10 K.

Supplementary Information 1B:

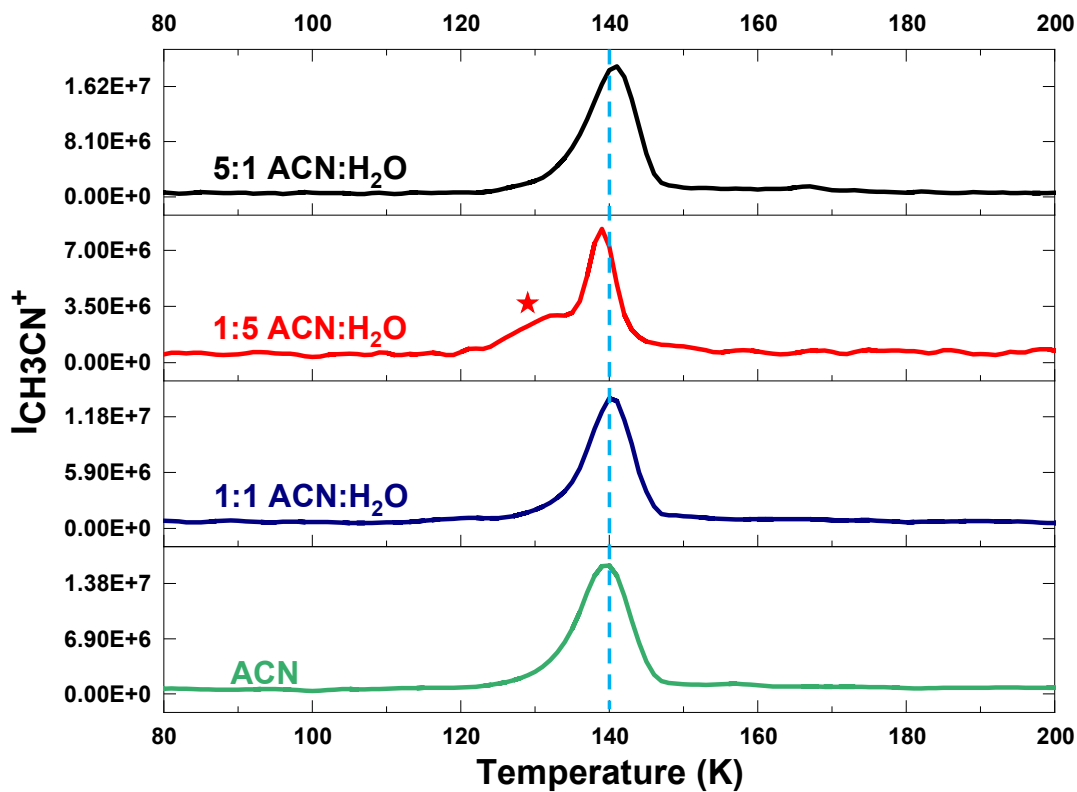

**Fig. S2B** TPD-MS spectra of 150 MLs of pure ACN (green), 300 MLs of 1:1 ACN:H<sub>2</sub>O (blue), 300 MLs of 1:5 ACN:H<sub>2</sub>O (red), and 300 MLs of 5:1 ACN:H<sub>2</sub>O (black). Ramping rate = 10 K.min<sup>-1</sup>. Here, the intensities of  $\text{CH}_3\text{CN}^+$  (m/z = 41) under these conditions are plotted. The marked desorption (\*) hump is due to the restricted ACN desorption from 1:5 ACN:H<sub>2</sub>O film during annealing.

## Supplementary information 2:

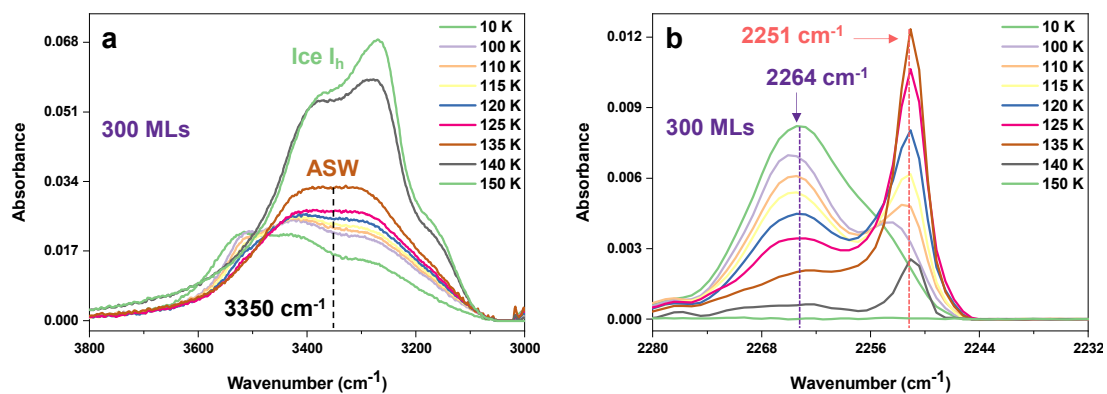

**Figure S3** Temperature-dependent RAIR spectra of 300 MLs of 1:1 ACN:H<sub>2</sub>O film co-deposited on Ru(0001) at 10 K and heated at a rate of 5 K min<sup>-1</sup>. (a) O-H stretching region (b) C≡N stretching region.

### Supplementary information 3:

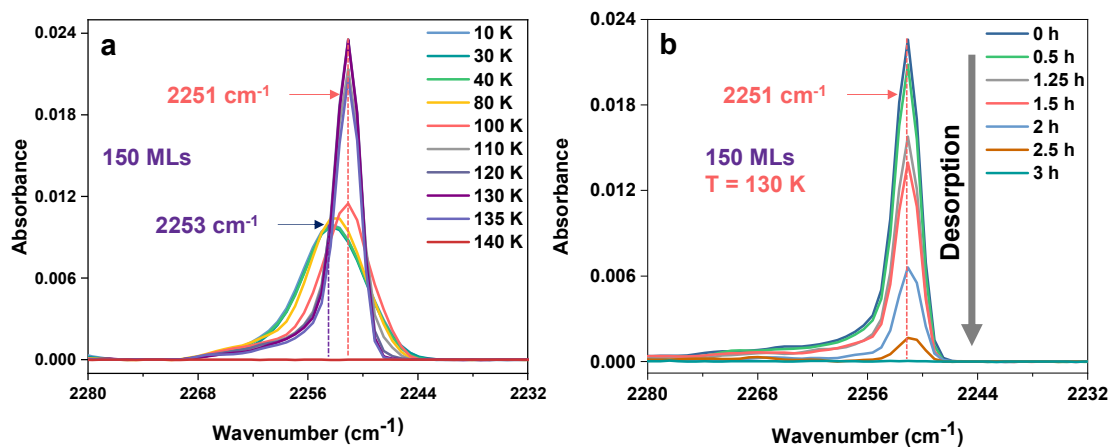

**Fig. S4** RAIR spectra of 150 MLs of pure ACN in the C≡N stretching region. (a) Temperature-dependent spectra taken after ACN deposited at 10 K and heated at a rate of 5 K min<sup>-1</sup> to the desorption temperature of ACN. ACN was found in two phases, where a low temperature amorphous phase (broad peak at ~ 2253 cm<sup>-1</sup>) converted into crystalline phase (sharp peak at 2251 cm<sup>-1</sup>) after 100 K.<sup>1,2</sup> (b) Isothermal time-dependent spectra at 130 K. The ACN vapour was deposited at 10 K and heated at a rate of 5 K min<sup>-1</sup> to and kept at 130 K. ACN desorbed from substrate within 3 h.

## Supplementary Information 4:

### (a) Hexagonal Ice

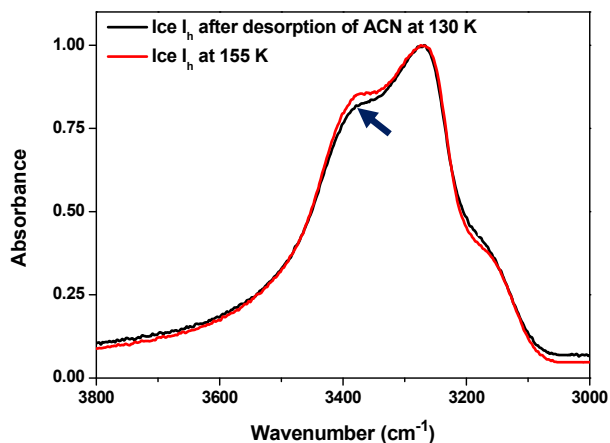

**Fig. S5a** RAIR spectra of Ice  $I_h$  obtained after desorption of ACN from 300 MLs of 1:1 ACN:H<sub>2</sub>O film at 130 K (black trace) and Ice  $I_h$  obtained after heating 150 MLs of pure solid H<sub>2</sub>O at 155 K (red trace) in the O-H stretching region. The spectra were normalized by the integral intensity of the absorbance. ACN:H<sub>2</sub>O (1:1) film of 300 MLs and pure H<sub>2</sub>O film of 150 MLs were prepared by depositing at 10 K and heating at a rate of 5 K min<sup>-1</sup> to the mentioned temperatures. Both the spectrum were almost identical and confirms the formation of Ice  $I_h$  after desorption of ACN from 1:1 ACN:H<sub>2</sub>O film.

### (b) Cubic Ice

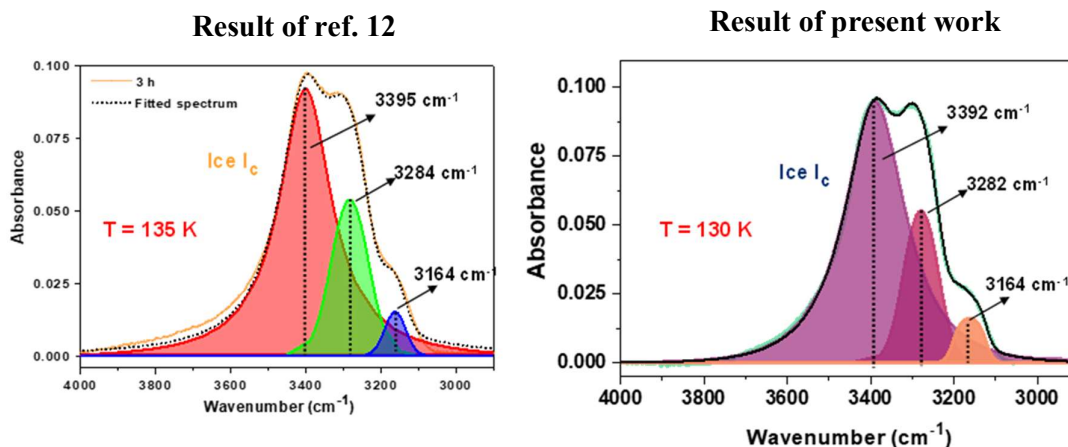

**Fig. S4b** The deconvoluted features of IR data of ref. 12 (J. Phys. Chem. Lett. vol. 11 (2020) p. 26) and the current work. In ref. 12, Ice  $I_c$  via acetone hydrate was prepared by annealing a co-deposited ~300 MLs acetone:H<sub>2</sub>O (1:1) film to 135 K and maintaining it there in UHV for 3 h.

### Supplementary Information 5:

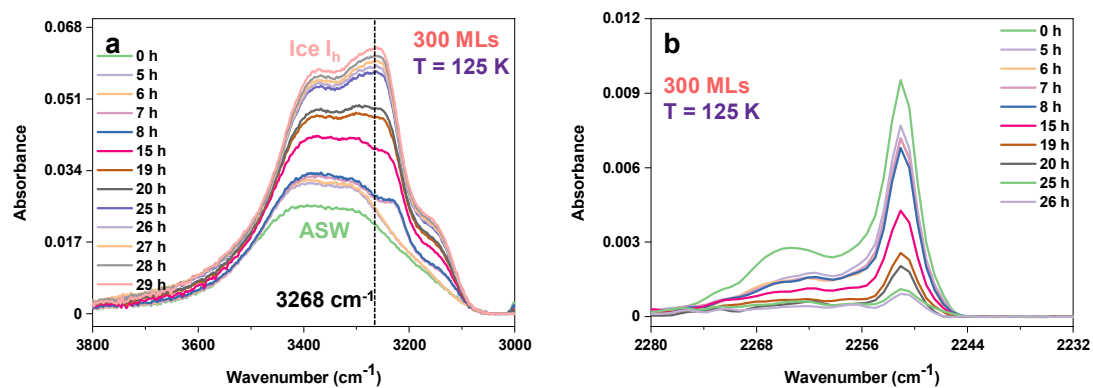

**Fig. S6** Isothermal time-dependent RAIR spectra of 300 MLs of 1:1 ACN:H<sub>2</sub>O film at 125 K in the (a) O-H stretching region and, (b) C≡N stretching region. Mixed film was prepared by vapour deposition on Ru(0001) at 10 K and heated to 125 K at a rate of 5 K min<sup>-1</sup>.



### Supplementary Information 6:

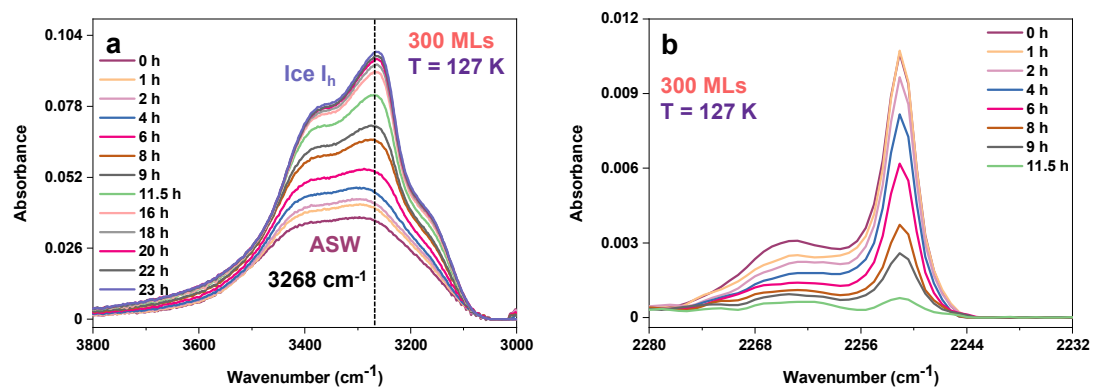

**Fig. S7** Isothermal time-dependent RAIR spectra of 300 MLs of 1:1 ACN:H<sub>2</sub>O film at 127 K in the (a) O-H stretching region and, (b) C≡N stretching region. Mixed film was prepared by vapour deposition on Ru(0001) at 10 K and heated to 127 K at a rate of 5 K min<sup>-1</sup>.

## Supplementary Information 7:

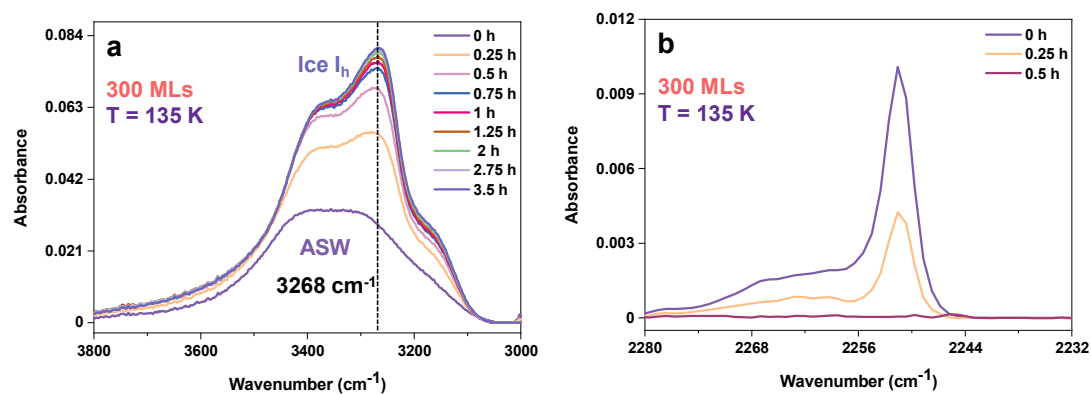

**Fig. S8** Isothermal time-dependent RAIR spectra of 300 MLs of 1:1 ACN:H<sub>2</sub>O film at 135 K in the (a) O-H stretching region and, (b) C≡N stretching region. Mixed film was prepared by vapour deposition on Ru(0001) at 10 K and heated to 135 K at a rate of 5 K min<sup>-1</sup>.

### Supplementary Information 8:

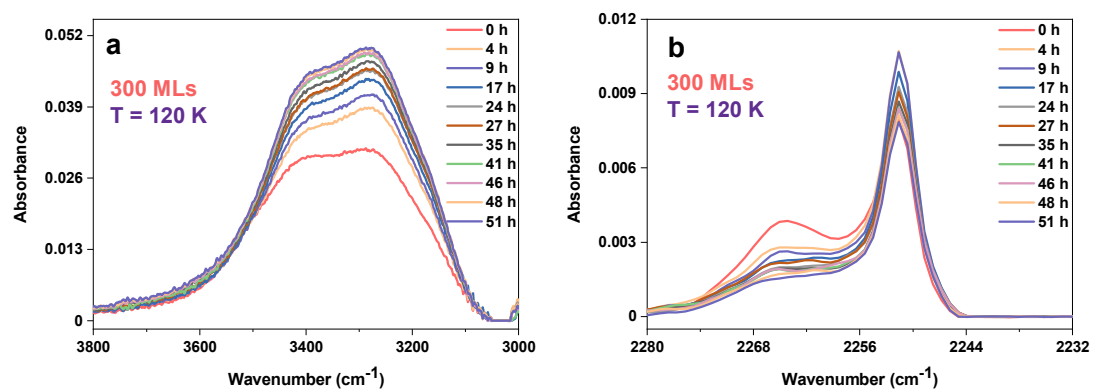

**Fig. S9** Isothermal time-dependent RAIR spectra of 300 MLs of 1:1 ACN:H<sub>2</sub>O film at 120 K in the (a) O-H stretching region and, (b) C≡N stretching region. Mixed film was prepared by vapour deposition on Ru(0001) at 10 K and heated to 120 K at a rate of 5 K min<sup>-1</sup>.

**Supplementary Information 9:**

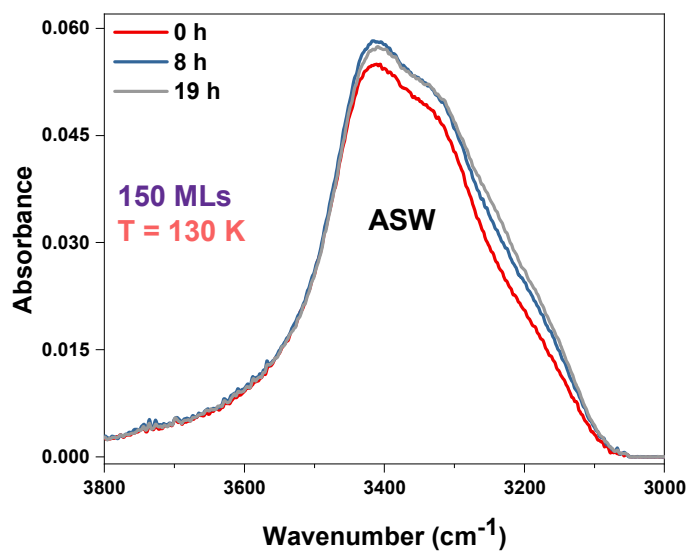

**Fig. S10** Isothermal time-dependent RAIR spectra of 150 MLs of H<sub>2</sub>O film at 130 K in the O-H stretching region. Thin film was prepared by vapour deposition on Ru(0001) at 10 K and heated to 130 K at a rate of 5 K min<sup>-1</sup>.

### Supplementary Information 10:

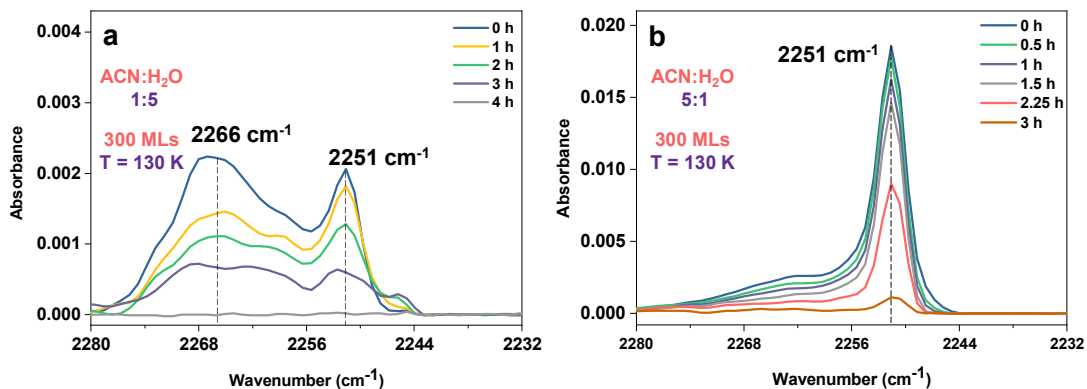

**Fig. S11** (a) Isothermal time-dependent RAIR spectra of 300 MLs of 1:5 ACN:H<sub>2</sub>O film at 130 K in the C≡N stretching region. (b) Isothermal time-dependent RAIR spectra of 300 MLs of 5:1 ACN:H<sub>2</sub>O film at 130 K in the C≡N stretching region. Mixed film was prepared by vapour deposition on Ru(0001) at 10 K and heated to 130 K at a rate of 5 K min<sup>-1</sup>.

## Supplementary Information 11:

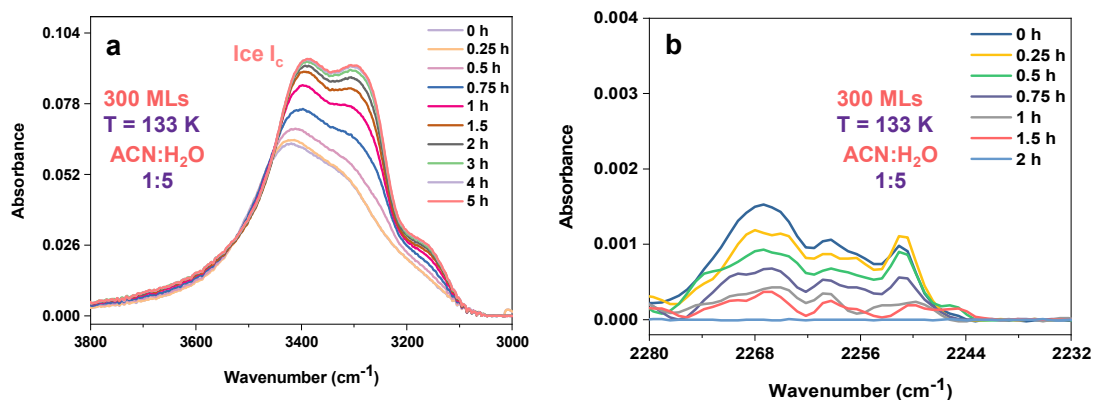

**Fig. S12** Isothermal time-dependent RAIR spectra of 300 MLs of 1:5 ACN:H<sub>2</sub>O film at 133 K in the (a) O-H stretching region and, (b) C≡N stretching region. Mixed film was prepared by vapour deposition on Ru(0001) at 10 K and heated to 133 K at a rate of 5 K min<sup>-1</sup>.

## Supplementary Information 12:

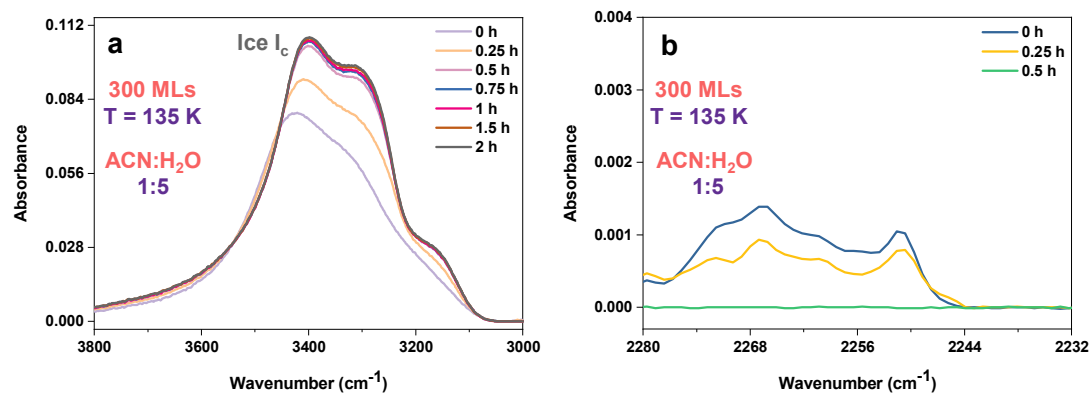

**Fig. S13** Isothermal time-dependent RAIR spectra of 300 MLs of 1:5 ACN:H<sub>2</sub>O film at 135 K in the (a) O-H stretching region and. (b) C≡N stretching region. Mixed film was prepared by vapour deposition on Ru(0001) at 10 K and heated to 135 K at a rate of 5 K min<sup>-1</sup>.

### Supplementary Information 13:

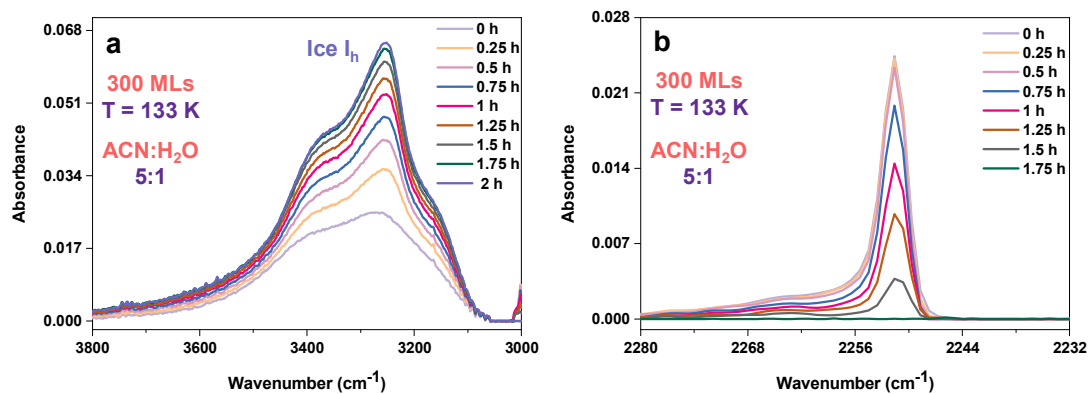

**Fig. S14** Isothermal time-dependent RAIR spectra of 300 MLs of 5:1 ACN:H<sub>2</sub>O film at 133 K in the (a) O-H stretching region and, (b) C≡N stretching region. Mixed film was prepared by vapour deposition on Ru(0001) at 10 K and heated to 133 K at a rate of 5 K min<sup>-1</sup>.



### Supplementary Information 14:

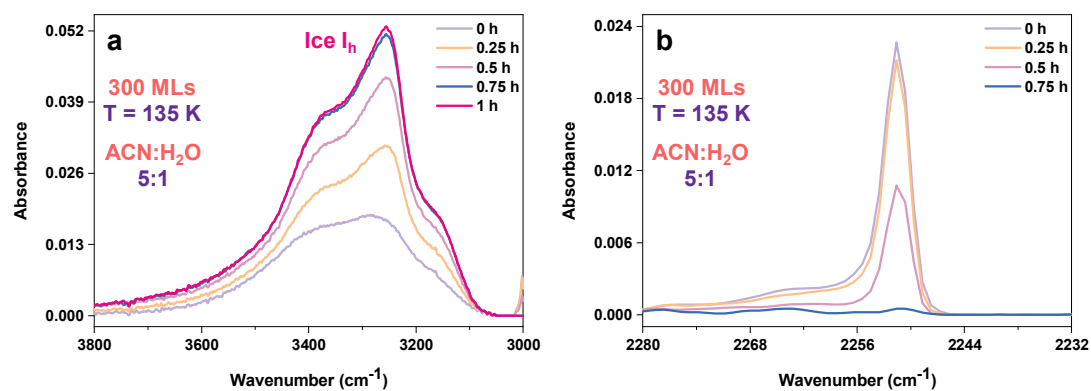

**Fig. S15** Isothermal time-dependent RAIR spectra of 300 MLs of 5:1 ACN:H<sub>2</sub>O film at 135 K in the (a) O-H stretching region and, (b) C≡N stretching region. Mixed film was prepared by vapour deposition on Ru(0001) at 10 K and heated to 135 K at a rate of 5 K min<sup>-1</sup>.

**Table S1** The parameters for crystallization of Ice I<sub>h</sub> during the desorption of ACN from ice films at different temperatures.

|                       | <b>Temperature (K)</b> | <b><i>n</i></b> | <b>Rate constant; <i>k</i> (s<sup>-1</sup>)</b> |
|-----------------------|------------------------|-----------------|-------------------------------------------------|
| <b>O-H stretching</b> | <b>125</b>             | <b>1.80</b>     | <b>1.39×10<sup>-05</sup></b>                    |
|                       | <b>127</b>             | <b>1.75</b>     | <b>2.66×10<sup>-05</sup></b>                    |
|                       | <b>130</b>             | <b>1.63</b>     | <b>9.60×10<sup>-05</sup></b>                    |
|                       | <b>135</b>             | <b>0.91</b>     | <b>8.05×10<sup>-04</sup></b>                    |

## References:

- (1) Tizek, H.; Grothe, H.; Knözinger, E. Gas-Phase Deposition of Acetonitrile: An Attempt to Understand Ostwald's Step Rule on a Molecular Basis. *Chem. Phys. Lett.* **2004**, *383* (1–2), 129–133.
- (2) Hudson, R. L.; Moore, M. H. Reactions of Nitriles in Ices Relevant to Titan, Comets, and the Interstellar Medium: Formation of Cyanate Ion, Ketenimines, and Isonitriles. *Icarus* **2004**, *172* (2), 466–478.
